# Supplementary material
Source: MDPI journal article supplement (https://www.mdpi.com/2073-4344/10/1/18)
Supplement: s1 [file s1]

# Supporting Materials: The Preparation and Characterization of Co–Ni Nanoparticles and the Testing of a Heterogenized Co–Ni/Alumina Catalyst for CO Hydrogenation

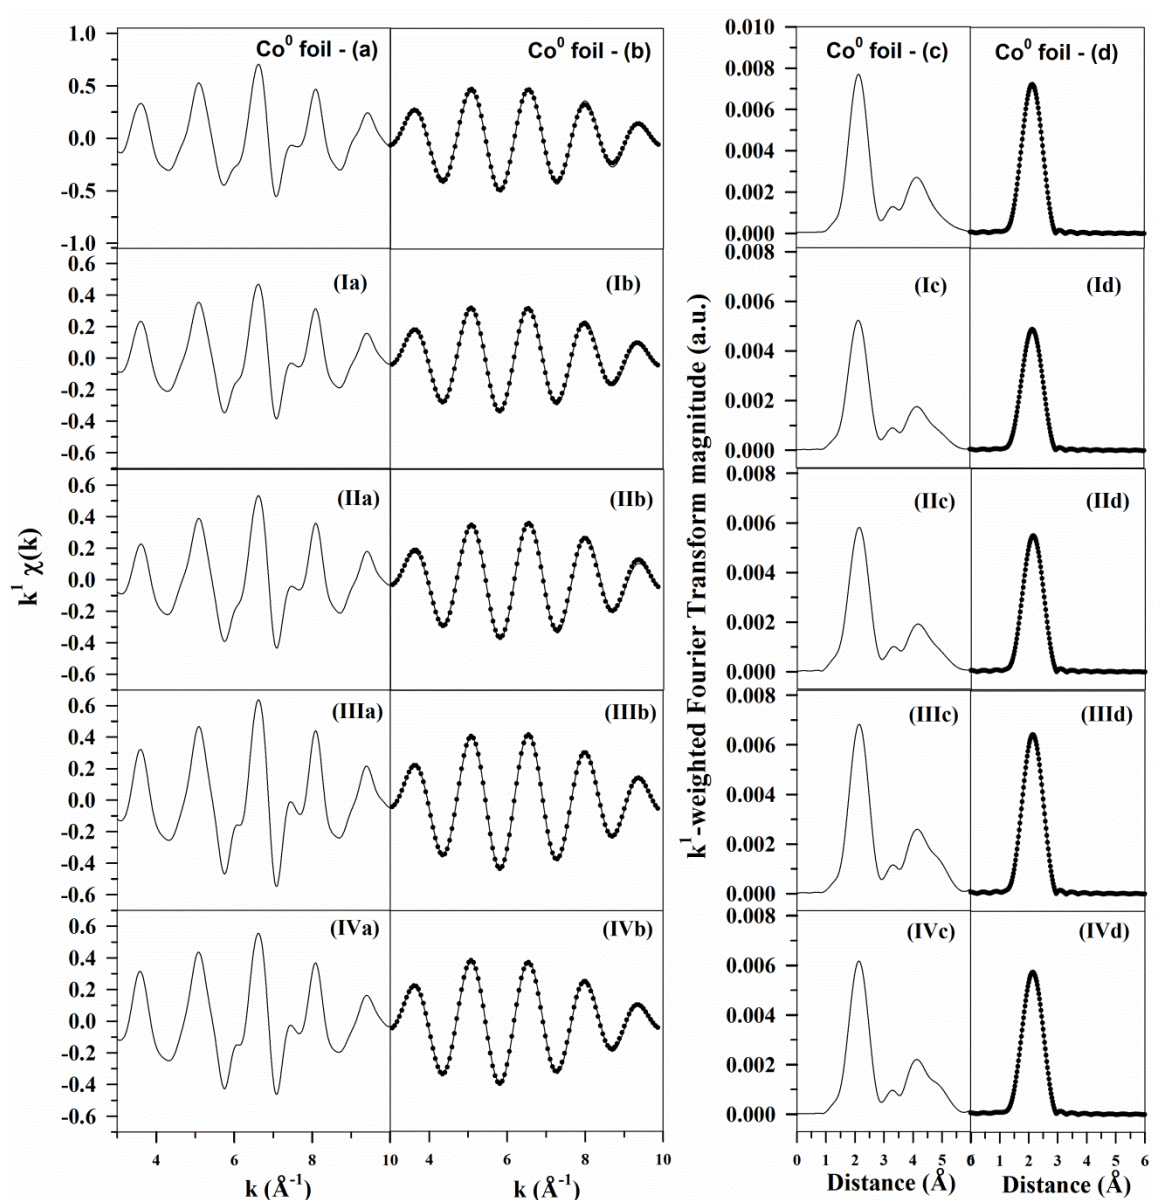

**Figure S1:** EXAFS fittings for Co K-edge data, including (a) raw  $k^1$ -weighted  $\chi(k)$  data, (b) (solid line) filtered  $k^1$ -weighted  $\chi(k)$  data and (filled circles) results of the fittings, and (c) (solid line) raw  $k^1$ -weighted Fourier transform magnitude and (d) (solid line) filtered  $k^1$ -weighted Fourier transform magnitude and (filled circles) results of the fittings for Co<sup>0</sup> foil, (I) Sample #1, (II) Sample #2, (III) Sample #3, and (IV) Sample #4 (fitting #2).

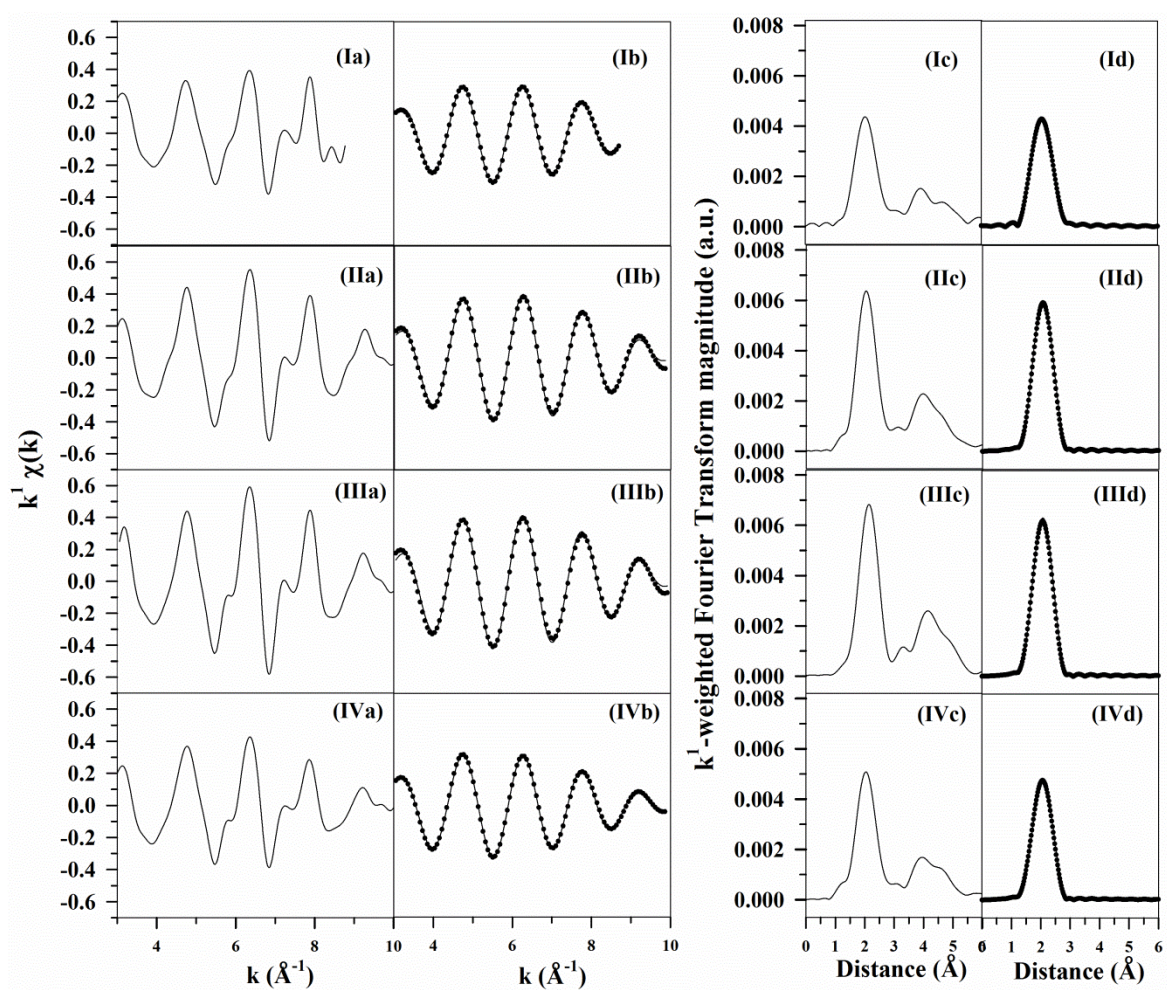

**Figure S2:** EXAFS fittings for Ni K-edge data, including (a) raw  $k^1$ -weighted  $\chi(k)$  data, (b) (solid line) filtered  $k^1$ -weighted  $\chi(k)$  data and (filled circles) results of the fittings, and (c) (solid line) raw  $k^1$ -weighted Fourier transform magnitude and (d) (solid line) filtered  $k^1$ -weighted Fourier transform magnitude and (filled circles) results of the fittings for (I) Sample #1, (II) Sample #2, (III) Sample #3, and (IV) Sample #4 (fitting #2).

**Table S1:** Results of EXAFS fitting\* for data acquired near the Co and Ni K edges for catalysts following TPR-EXAFS after cooling. The fitting ranges were  $\Delta k = 3 - 10 \text{ \AA}^{-1}$  and  $\Delta R = 1.2 - 2.8 \text{ \AA}$ . \* $S_0^2$  set to 0.90. \*\* Fixed parameter.

| Sample Description         | N Co-Co metal | R Co-Co ( $\text{\AA}$ ) metal | N Co-Ni metal  | R Co-Ni ( $\text{\AA}$ ) metal | N Ni-Ni metal  | R Ni-Ni ( $\text{\AA}$ ) metal | N Ni-Co metal | R Ni-Co ( $\text{\AA}$ ) Metal | $e_0$ (eV)                        | $\sigma^2$ ( $\text{\AA}^2$ ) | r-factor |
|----------------------------|---------------|--------------------------------|----------------|--------------------------------|----------------|--------------------------------|---------------|--------------------------------|-----------------------------------|-------------------------------|----------|
| Co <sup>0</sup> foil       | <b>12**</b>   | 2.495<br>(0.0055)              | -              | -                              | -              | -                              | -             | -                              | 7.019<br>(0.574)                  | 0.00744<br>(0.00038)          | 0.0037   |
| Catalyst 1                 | 8.2<br>(2.9)  | 2.501<br>(0.0061)              | 0.001<br>(3.5) | 2.493<br>(0.0061)              | 0.001<br>(3.5) | 2.484<br>(0.0061)              | 7.5<br>(2.5)  | 2.493<br>(0.0061)              | 7.522 (0.8760)<br>-6.066 (0.7450) | 0.00746<br>(0.001316)         | 0.0064   |
| Catalyst 2                 | 7.6<br>(4.2)  | 2.496<br>(0.0060)              | 0.68<br>(5.5)  | 2.487<br>(0.0060)              | 0.73<br>(5.9)  | 2.479<br>(0.0060)              | 8.1<br>(4.2)  | 2.487<br>(0.0060)              | 7.079 (0.8044)<br>-6.532 (0.6600) | 0.00615<br>(0.001358)         | 0.0058   |
| Catalyst 3                 | 9.0<br>(3.4)  | 2.494<br>(0.0034)              | 0.74<br>(4.2)  | 2.486<br>(0.0034)              | 0.71<br>(4.1)  | 2.477<br>(0.0034)              | 8.7<br>(3.0)  | 2.486<br>(0.0034)              | 7.145 (0.6623)<br>-6.564 (0.7613) | 0.00636<br>(0.000816)         | 0.0058   |
| Catalyst 4<br>(fitting #1) | 9.8<br>(9.7)  | 2.502<br>(0.0070)              | 1.4<br>(12.0)  | 2.493<br>(0.0070)              | 1.2<br>(10.2)  | 2.485<br>(0.0070)              | 8.0<br>(7.2)  | 2.493<br>(0.0070)              | 8.131 (1.000)<br>-6.210 (0.845)   | 0.00894<br>(0.00142)          | 0.0052   |
| Catalyst 4<br>(fitting #2) | 9.5<br>(0.5)  | 2.497<br>(0.0037)              | 1.0<br>(0.1)   | 2.488<br>(0.0037)              | 0.8<br>(0.1)   | 2.480<br>(0.0037)              | 7.9<br>(0.3)  | 2.488<br>(0.0037)              | 6.978 (0.422)<br>-6.542 (0.392)   | 0.00840<br>(0.00058)          | 0.0023   |



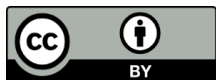

© 2019 by the authors. Licensee MDPI, Basel, Switzerland. This article is an open access article distributed under the terms and conditions of the Creative Commons Attribution (CC BY) license (<http://creativecommons.org/licenses/by/4.0/>).
